# Supplementary material for: Real-time biological early-warning system based on freshwater mussels’ valvometry data
Source: Copernicus journal article supplement (doi:10.5194/hess-28-2297-2024), 2024-05-30
Supplement: Supplementary file 2 [file hess-28-2297-2024-supplement.pdf]

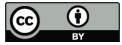

*Supplement of*

## **Real-time biological early-warning system based on freshwater mussels' valvometry data**

**Ashkan Pilbala et al.**

*Correspondence to:* Sebastiano Piccolroaz ([s.piccolroaz@unitn.it](mailto:s.piccolroaz@unitn.it))

The copyright of individual parts of the supplement might differ from the article licence.

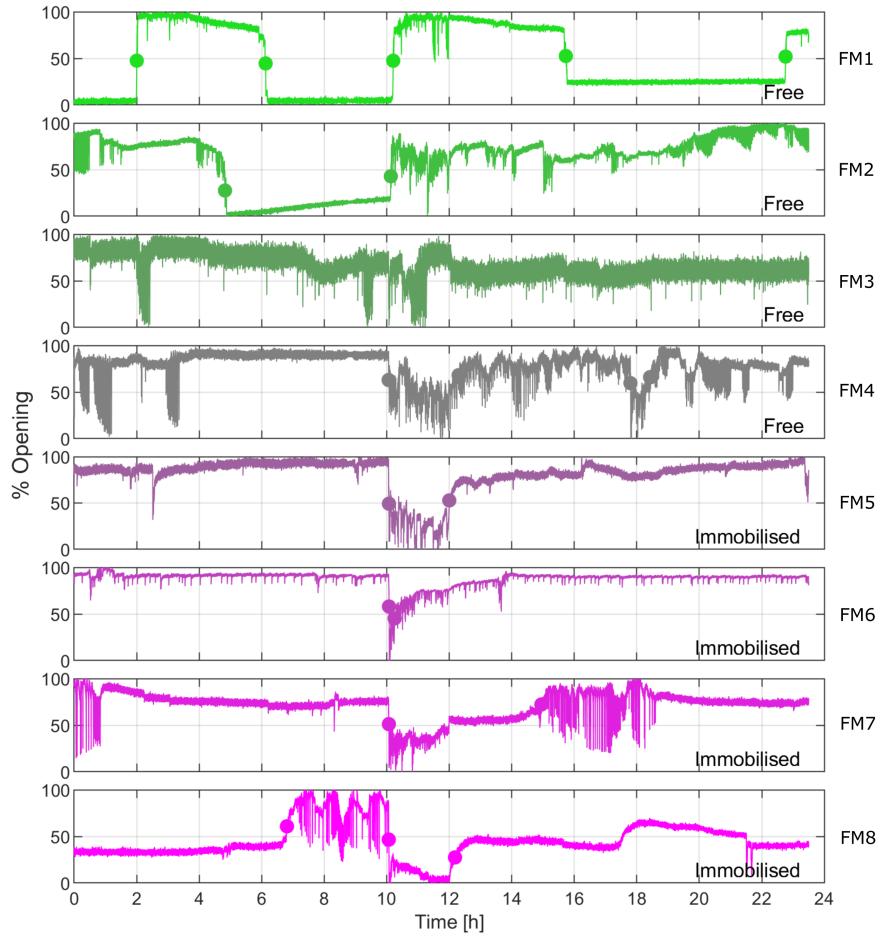

**Figure S1.** Valve opening signals for the individual free and immobilised FMs deployed in the laboratory experiment (dots indicate abrupt change points in the mean of the opening signals when the mean opening changes by more than 25% ).

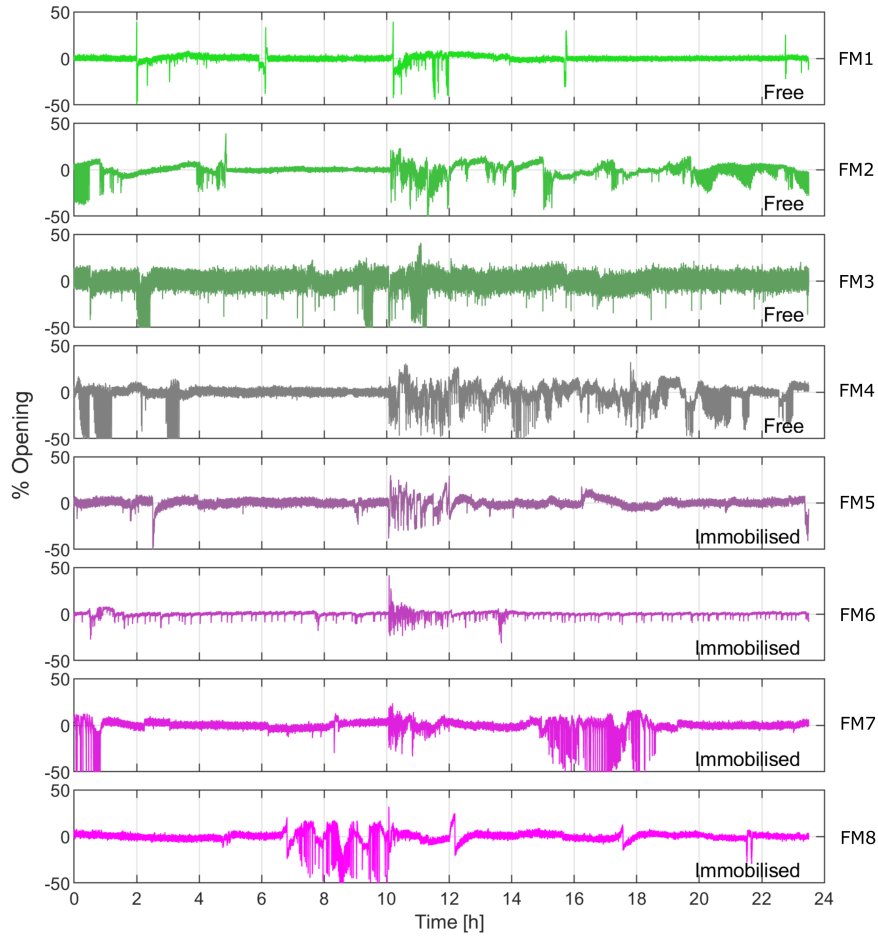

**Figure S2.** Valve opening signals for the individual free and immobilised FMs deployed in the laboratory experiment after detrending and removal of step changes in the mean valve opening.

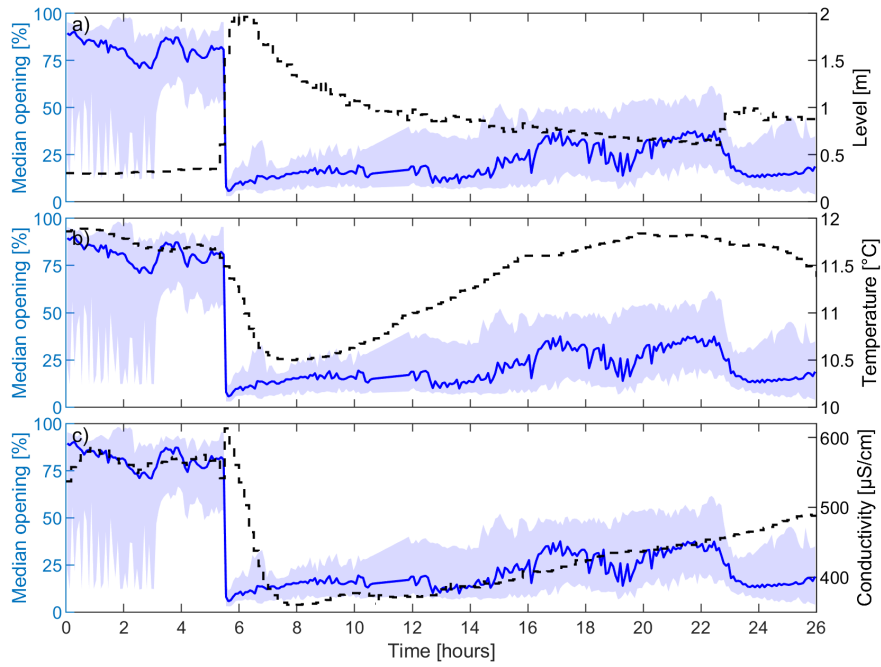

**Figure S3.** Data from the multiparametric sensor installed at the field monitoring site; a) left y-axis: median valve opening signal with 25<sup>th</sup> and 75<sup>th</sup> percentiles indicated by the shaded area; right y-axis: water level; b) left y-axis: as in a); right y-axis: water temperature; c) left y-axis: as in a); right y-axis: water conductivity.

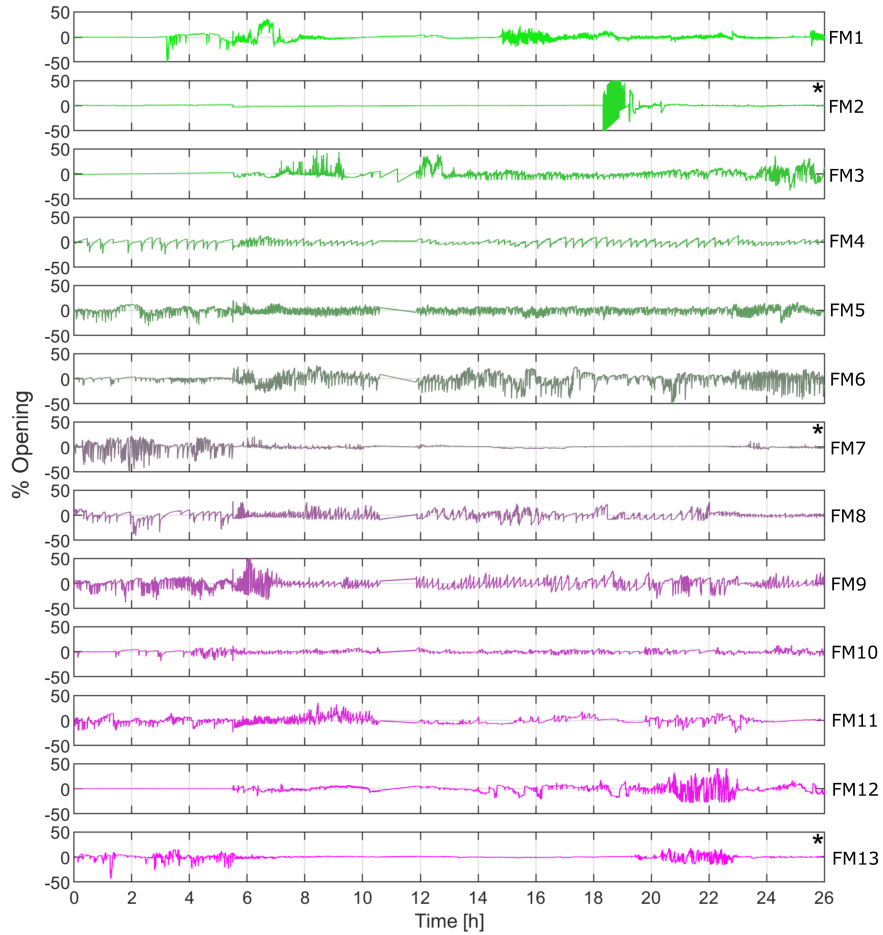

**Figure S4.** Valve opening signals for the individual immobilised FMs deployed at the field monitoring site after detrending and removal of step changes in the mean valve opening. The asterisk \* depicts FMs that are excluded from the wavelet transform analysis presented in Figure 5 in the main text.
